# Supplementary material
Source: publisher figshare collection journal article supplement (https://future-science-group.figshare.com/ndownloader/files/30743830)
Supplement: Supplementary file 1 [file 30743830]

| **Supplementary Table 1. Impact of treatment strategy on overall and cancer-specific survival (among patients with complete information)*.** | | |
| --- | --- | --- |
| **Treatment strategy** | **Overall survival**  **HR (95% CI)** | **Cancer-specific survival**  **HR (95% CI)** |
| Treatment strategy  Adjuvant Chemo/RT  Surgery only  Adjuvant chemotherapy  Perioperative chemotherapy | Reference  1.72 (1.60-1.85)  1.24 (1.13-1.36)  0.68 (0.59-0.78) | Reference  1.64 (1.51-1.78)  1.27 (1.15-1.40)  0.71 (0.61-0.82) |
| *Multivariable Cox regression analysis adjusted for all factors included in the main analysis and limited only to 8538 patients with complete information. | | |
